# Supplementary material for: Oral Lactate Administration Additively Enhances Endurance Training-Induced Increase in Cytochrome C Oxidase Activity in Mouse Soleus Muscle
Source: PubMed Central journal article supplement (PMC7146285; doi:10.3390/nu12030770), 2020-03-14
Supplement: nutrients-12-00770-s001.pdf [file nutrients-12-00770-s001.pdf]

**Table S1: Antibodies**

| Primary antibody        | Reference number; Manufacturer                 |
|-------------------------|------------------------------------------------|
| MCT1                    | custom-made; Qiagen Japan, Tokyo, Japan        |
| MCT4                    | custom-made; Qiagen Japan, Tokyo, Japan        |
| Phosphorylated AMPK     | no. 2513; CST Japan, Tokyo, Japan              |
| Total AMPK              | no. 2532; CST Japan, Tokyo, Japan              |
| Phosphorylated ACC      | no. 3661; CST Japan, Tokyo, Japan              |
| Total ACC               | no. 3662; CST Japan, Tokyo, Japan              |
| Phosphorylated p38 MAPK | no. 9211; CST Japan, Tokyo, Japan              |
| Total p38 MAPK          | no. 9212; CST Japan, Tokyo, Japan              |
| Phosphorylated CaMKII   | no. 3361; CST Japan, Tokyo, Japan              |
| Total CamKII            | no. 611292; BD Biosciences Japan, Tokyo, Japan |

| Secondary antibody         | Reference number; Manufacturer                 |
|----------------------------|------------------------------------------------|
| Rabbit anti-goat IgG (H&L) | A106PU; American Qualex, San Clemente, CA, USA |
| Mouse anti-goat IgG (H&L)  | A102PT; American Qualex, San Clemente, CA, USA |

**Table S2: F values and degrees of freedom**

**Blood lactate concentration after the exercise**

|              |                  |
|--------------|------------------|
| F (DFn, DFd) | F (7, 7) = 8.372 |
| P value      | $p < 0.01$       |

**Four-week experiment**

| Measurement items   | Interaction<br>F (DFn, DFd)<br><i>p</i> value | Training<br>F (DFn, DFd)<br><i>p</i> value | Lactate<br>F (DFn, DFd)<br><i>p</i> value |
|---------------------|-----------------------------------------------|--------------------------------------------|-------------------------------------------|
| Initial body weight | F (1, 29) = 0.009506<br>not significant       | F (1, 29) = 0.003213<br>not significant    | F (1, 29) = 0.3086<br>not significant     |
| Final body weight   | F (1, 29) = 0.1232<br>not significant         | F (1, 29) = 0.3011<br>not significant      | F (1, 29) = 0.2795<br>not significant     |
| Plantaris muscle    | F (1, 29) = 0.003893<br>not significant       | F (1, 29) = 0.007735<br>not significant    | F (1, 29) = 1.223<br>not significant      |
| Soleus muscle       | F (1, 29) = 0.08501<br>not significant        | F (1, 29) = 3.358<br>not significant       | F (1, 29) = 0.4881<br>not significant     |
| Energy intake       | F (1, 29) = 0.27<br>not significant           | F (1, 29) = 0.6512<br>not significant      | F (1, 29) = 1.343<br>not significant      |

**Plantaris muscle**

| Measurement items | Interaction<br>F (DFn, DFd)<br><i>p</i> value | Training<br>F (DFn, DFd)<br><i>p</i> value | Lactate<br>F (DFn, DFd)<br><i>p</i> value |
|-------------------|-----------------------------------------------|--------------------------------------------|-------------------------------------------|
| CS activity       | F (1, 29) = 0.5378<br>not significant         | F (1, 29) = 23.41<br>$p < 0.01$            | F (1, 29) = 2.547<br>not significant      |
| COX activity      | F (1, 29) = 1.582<br>not significant          | F (1, 29) = 25.28<br>$p < 0.01$            | F (1, 29) = 0.0005285<br>not significant  |
| MCT1              | F (1, 29) = 0.4902<br>not significant         | F (1, 29) = 5.813<br>$p < 0.05$            | F (1, 29) = 0.6752<br>not significant     |
| MCT4              | F (1, 29) = 2.156<br>not significant          | F (1, 29) = 0.1472<br>not significant      | F (1, 29) = 3.213<br>not significant      |

**Soleus muscle**

| Measurement items | Interaction<br>F (DFn, DFd)<br><i>p</i> value | Training<br>F (DFn, DFd)<br><i>p</i> value | Lactate<br>F (DFn, DFd)<br><i>p</i> value |
|-------------------|-----------------------------------------------|--------------------------------------------|-------------------------------------------|
| CS activity       | F (1, 29) = 1.65<br>not significant           | F (1, 29) = 8.772<br>$p < 0.01$            | F (1, 29) = 2.744<br>not significant      |
| COX activity      | F (1, 29) = 0.004481<br>not significant       | F (1, 29) = 11.97<br>$p < 0.01$            | F (1, 29) = 6.222<br>$p < 0.05$           |
| MCT1              | F (1, 29) = 0.2577<br>not significant         | F (1, 29) = 0.007857<br>not significant    | F (1, 29) = 0.1283<br>not significant     |
| MCT4              | F (1, 29) = 0.05859<br>not significant        | F (1, 29) = 6.437<br>$p < 0.05$            | F (1, 29) = 3.902<br>not significant      |

**Heart muscle**

| Measurement items | Interaction<br>F (DFn, DFd)<br><i>p</i> value | Training<br>F (DFn, DFd)<br><i>p</i> value | Lactate<br>F (DFn, DFd)<br><i>p</i> value |
|-------------------|-----------------------------------------------|--------------------------------------------|-------------------------------------------|
| CS activity       | F (1, 29) = 0.005462<br>not significant       | F (1, 29) = 1.708<br>not significant       | F (1, 29) = 0.9463<br>not significant     |
| COX activity      | F (1, 29) = 1.028<br>not significant          | F (1, 29) = 1.162<br>not significant       | F (1, 29) = 5.149<br>$p < 0.05$           |

**Single bout experiment**

**Plantaris muscle**

| Measurement items | Interaction<br>F (DFn, DFd)<br><i>p</i> value | Training<br>F (DFn, DFd)<br><i>p</i> value | Lactate<br>F (DFn, DFd)<br><i>p</i> value |
|-------------------|-----------------------------------------------|--------------------------------------------|-------------------------------------------|
| P/T-AMPK          | F (1, 28) = 0.1001<br>not significant         | F (1, 28) = 10.11<br>$p < 0.01$            | F (1, 28) = 0.8613<br>not significant     |
| P/T-ACC           | F (1, 28) = 0.004061<br>not significant       | F (1, 28) = 17.26<br>$p < 0.01$            | F (1, 28) = 1.411<br>not significant      |
| P/T-p38 MAPK      | F (1, 28) = 0.005762<br>not significant       | F (1, 28) = 7.08<br>$p < 0.05$             | F (1, 28) = 0.06139<br>not significant    |
| P/T-CaMKII        | F (1, 28) = 0.2398<br>not significant         | F (1, 28) = 7.786<br>$p < 0.01$            | F (1, 28) = 1.609<br>not significant      |

**Soleus muscle**

| Measurement items | Interaction<br>F (DFn, DFd)<br><i>p</i> value | Training<br>F (DFn, DFd)<br><i>p</i> value | Lactate<br>F (DFn, DFd)<br><i>p</i> value |
|-------------------|-----------------------------------------------|--------------------------------------------|-------------------------------------------|
| P/T-AMPK          | F (1, 28) = 3.877e-005<br>not significant     | F (1, 28) = 0.108<br>not significant       | F (1, 28) = 0.1129<br>not significant     |
| P/T-ACC           | F (1, 28) = 0.1837<br>not significant         | F (1, 28) = 5.677<br>$p < 0.05$            | F (1, 28) = 0.09205<br>not significant    |
| P/T-p38 MAPK      | F (1, 28) = 0.0823<br>not significant         | F (1, 28) = 25.25<br>$p < 0.01$            | F (1, 28) = 0.7724<br>not significant     |
| P/T-CaMKII        | F (1, 28) = 0.009092<br>not significant       | F (1, 28) = 1.17<br>not significant        | F (1, 28) = 0.2606<br>not significant     |
